# Supplementary material for: Simple and efficient protocol for synthesis of pyrido[1,2-a]pyrimidin-4-one derivatives over solid heteropolyacid catalysts
Source: Royal Society of Chemistry journal article supplement (doi:10.1039/c5ra22180c), 2016-01-01
Supplement: c5ra22180c1.pdf [file c5ra22180c1.pdf]

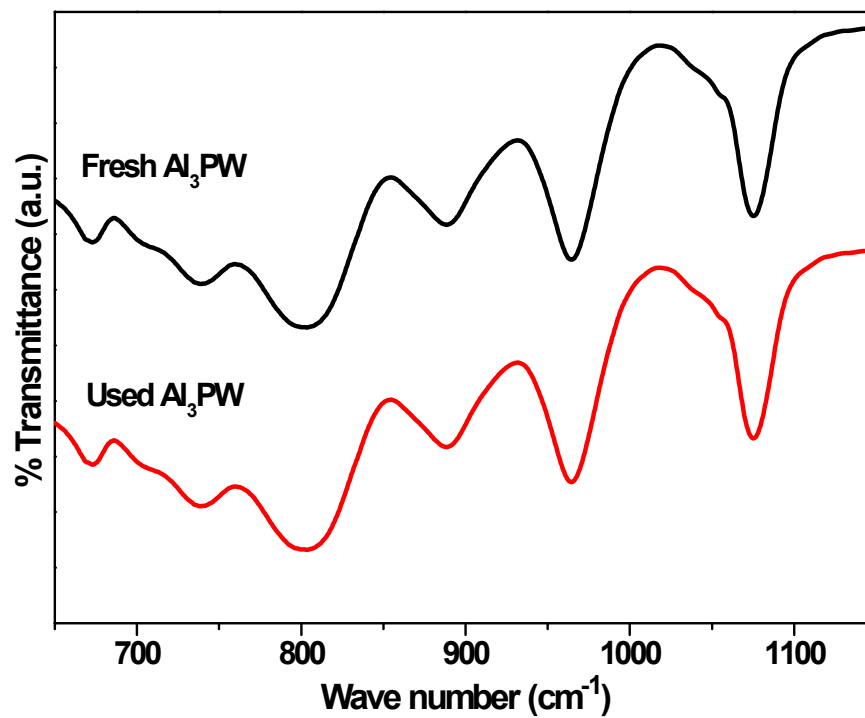

**Figure S1:** FTIR spectra of fresh and used Al<sub>3</sub>PW catalyst

Proton NMR spectra

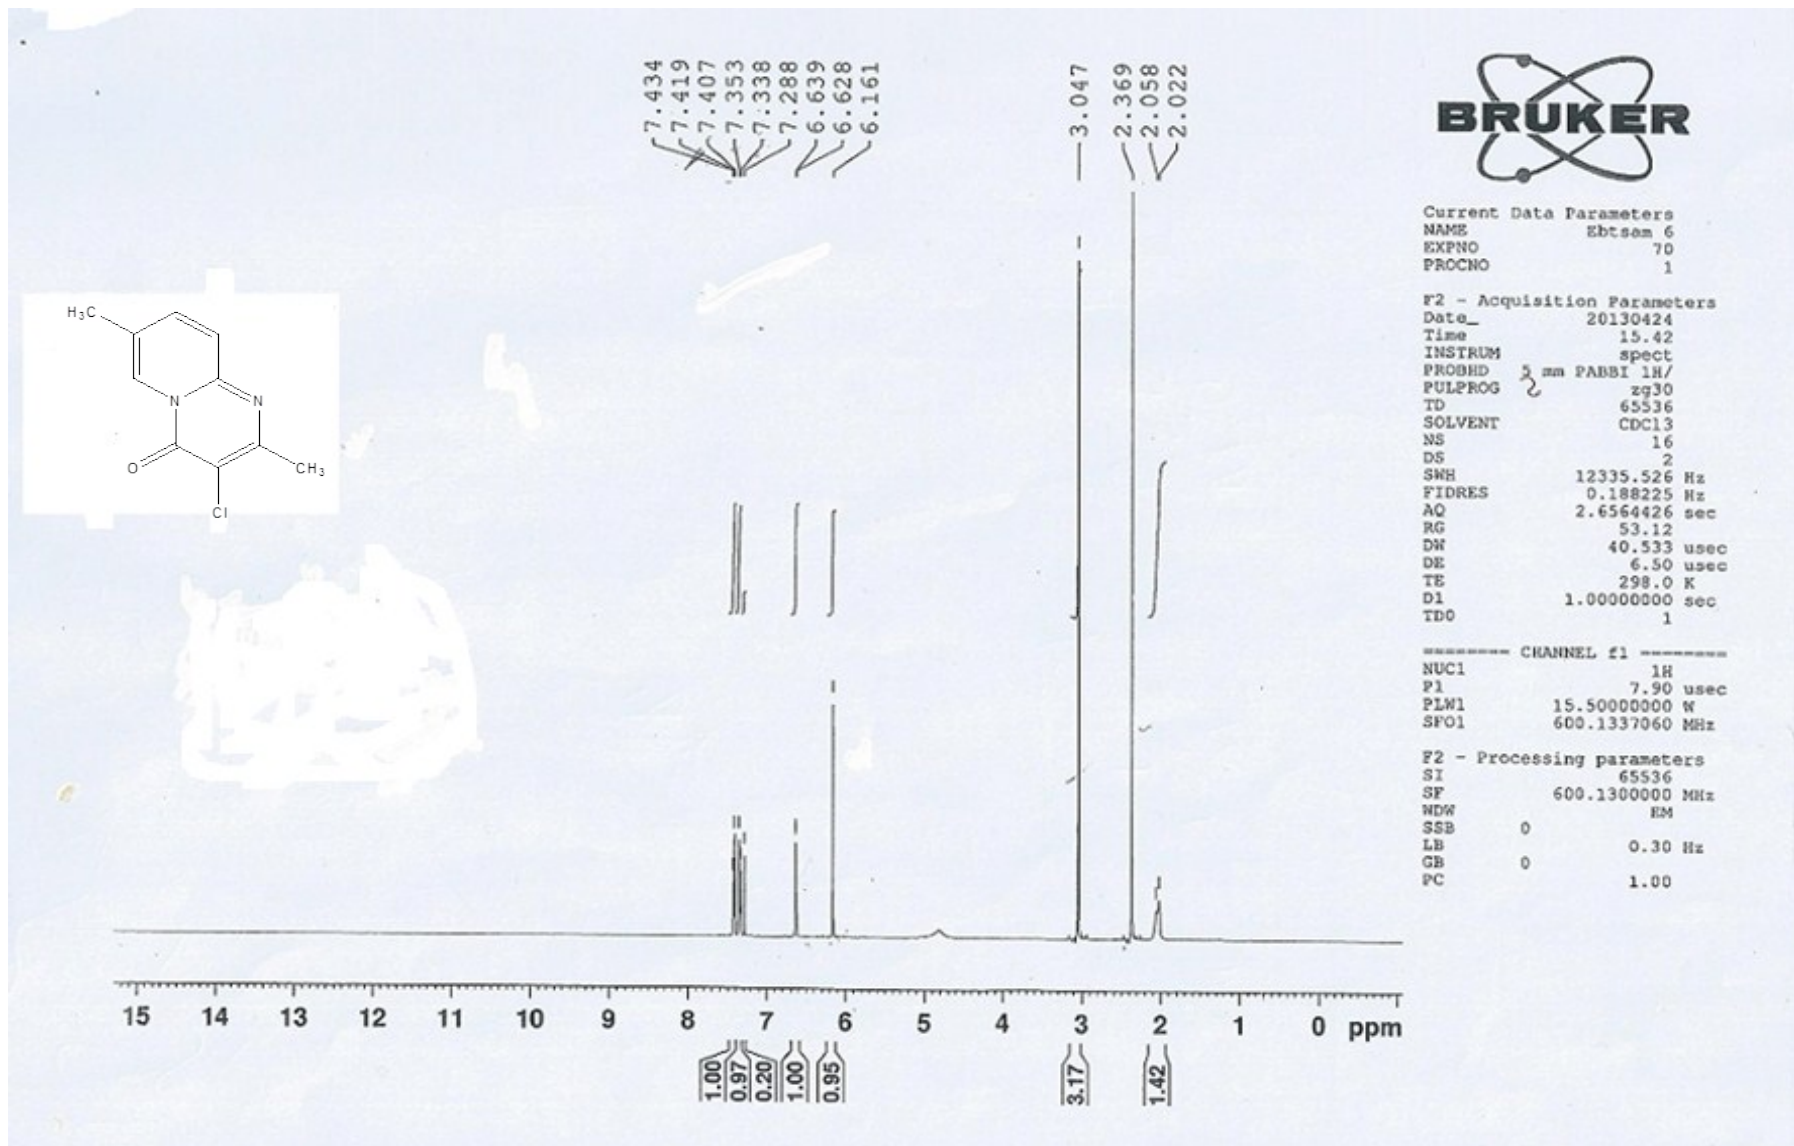

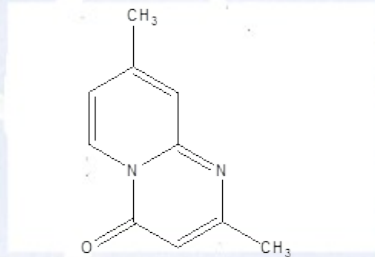

8.087  
8.083  
8.074  
8.071  
7.512  
7.507  
7.498  
7.460  
7.448  
7.434  
7.288  
6.747  
6.662  
6.651

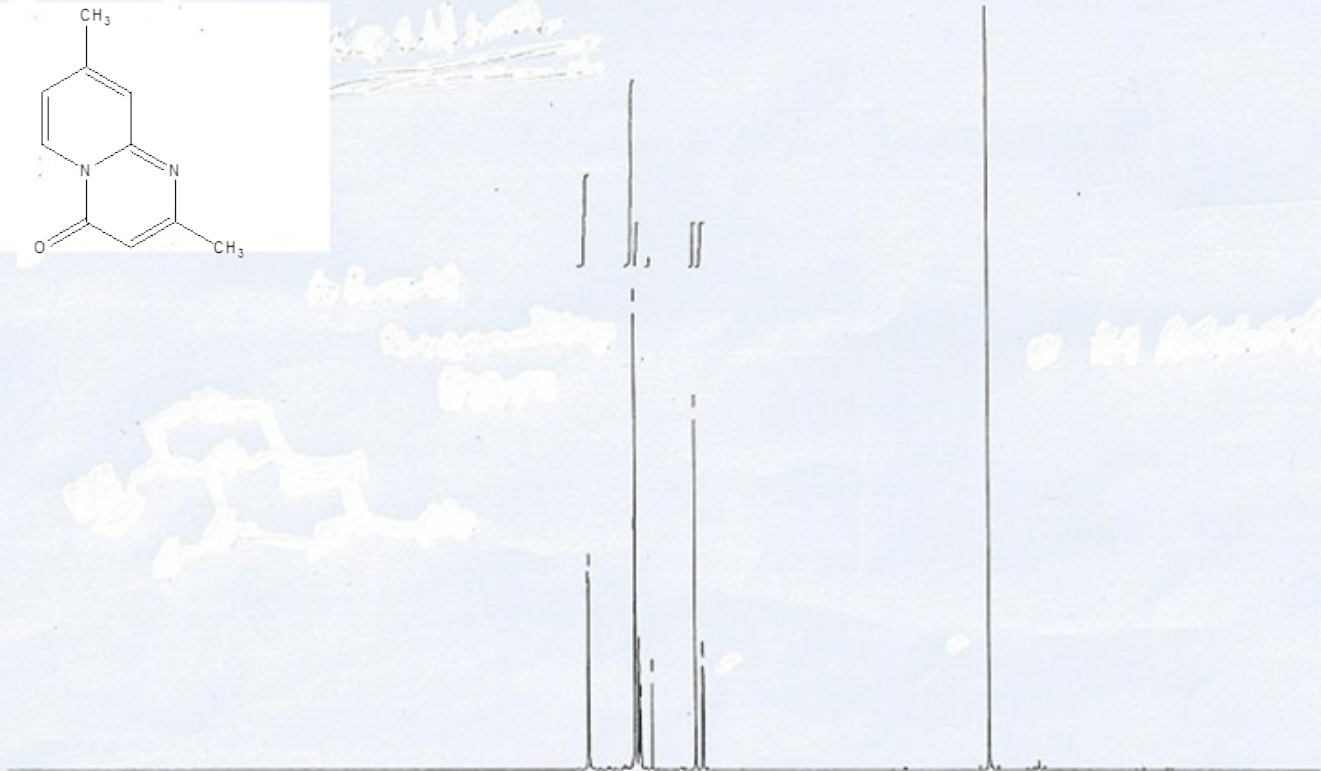

15 14 13 12 11 10 9 8 7 6 5 4 3 2 1 0 ppm

1.00  
2.02  
0.48  
0.09  
0.48  
0.48

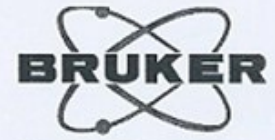

Current Data Parameters  
NAME Edtsen 3  
EXPNO 70  
PROCNO 1

F2 - Acquisition Parameters  
Date\_ 20130424  
Time 14.48  
INSTRUM spect  
PROBHD 5 mm PABBI 1H/  
PULPROG zg30  
TD 65536  
SOLVENT CDCl3  
NS 16  
DS 2  
SWH 12335.526 Hz  
FIDRES 0.188225 Hz  
AQ 2.6564426 sec  
RG 74.07  
DW 40.533 usec  
DE 6.50 usec  
TE 298.0 K  
D1 1.00000000 sec  
TD0 1

----- CHANNEL f1 -----  
NUC1 1H  
P1 7.90 usec  
PLW1 15.50000000 W  
SFO1 600.1337060 MHz

F2 - Processing parameters  
SI 65536  
SF 600.1300000 MHz  
WDW EM  
SSB 0  
LB 0.30 Hz  
GB 0  
PC 1.00

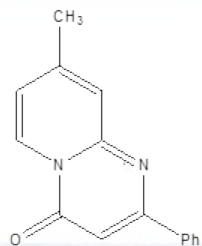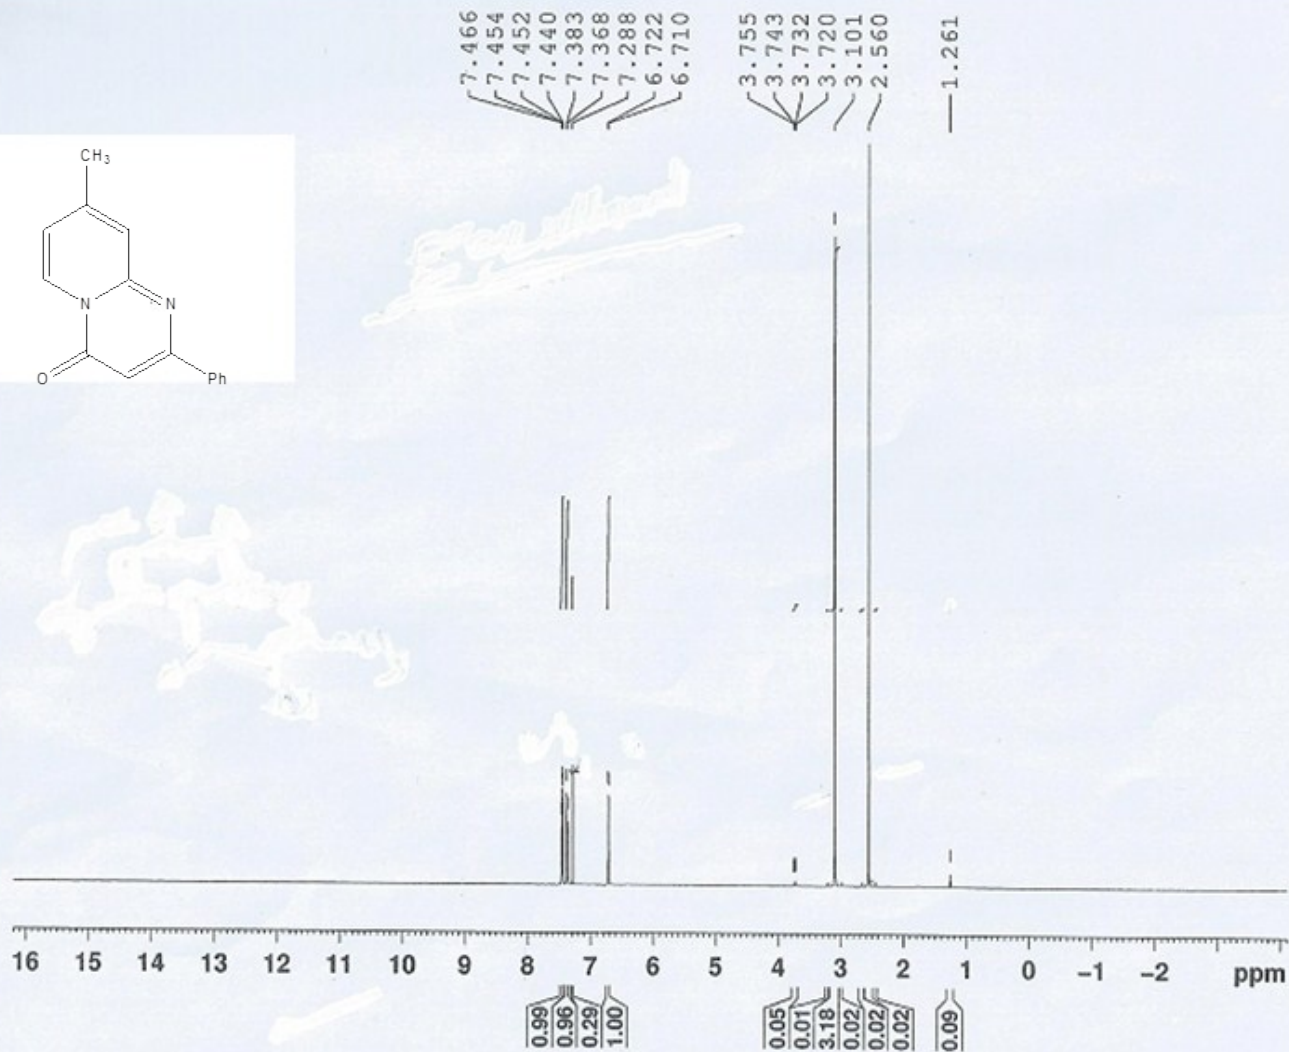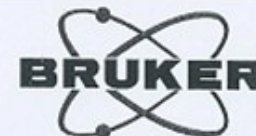

Current Data Parameters  
 NAME Ebtam 1  
 EXPNO 10  
 PROCNO 1

F2 - Acquisition Parameters  
 Date\_ 20130424  
 Time 13.59  
 INSTRUM spect  
 PROBHD 5 mm PABBI 1H/  
 PULPROG zg30  
 TD 65536  
 SOLVENT CDCl3  
 NS 16  
 DS 2  
 SWH 12335.526 Hz  
 FIDRES 0.188225 Hz  
 AQ 2.6564426 sec  
 RG 173.48  
 DW 40.533 usec  
 DE 6.50 usec  
 TE 298.0 K  
 D1 1.00000000 sec  
 T00 1

----- CHANNEL f1 -----  
 NUC1 1H  
 P1 7.90 usec  
 PLW1 15.50000000 W  
 SFO1 600.1337060 MHz

F2 - Processing parameters  
 SI 65536  
 SF 600.1300000 MHz  
 WDW EM  
 SSB 0  
 LB 0.30 Hz  
 GB 0  
 PC 1.00

Dr. Raoo  
 Sample : N-21 CDCL3  
 PROTON CDCL3 D:\ nmr

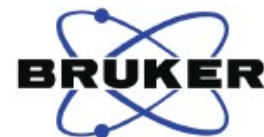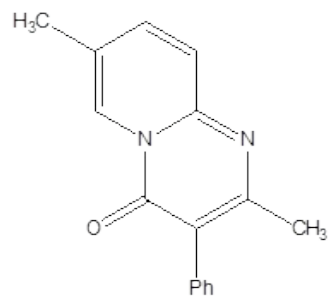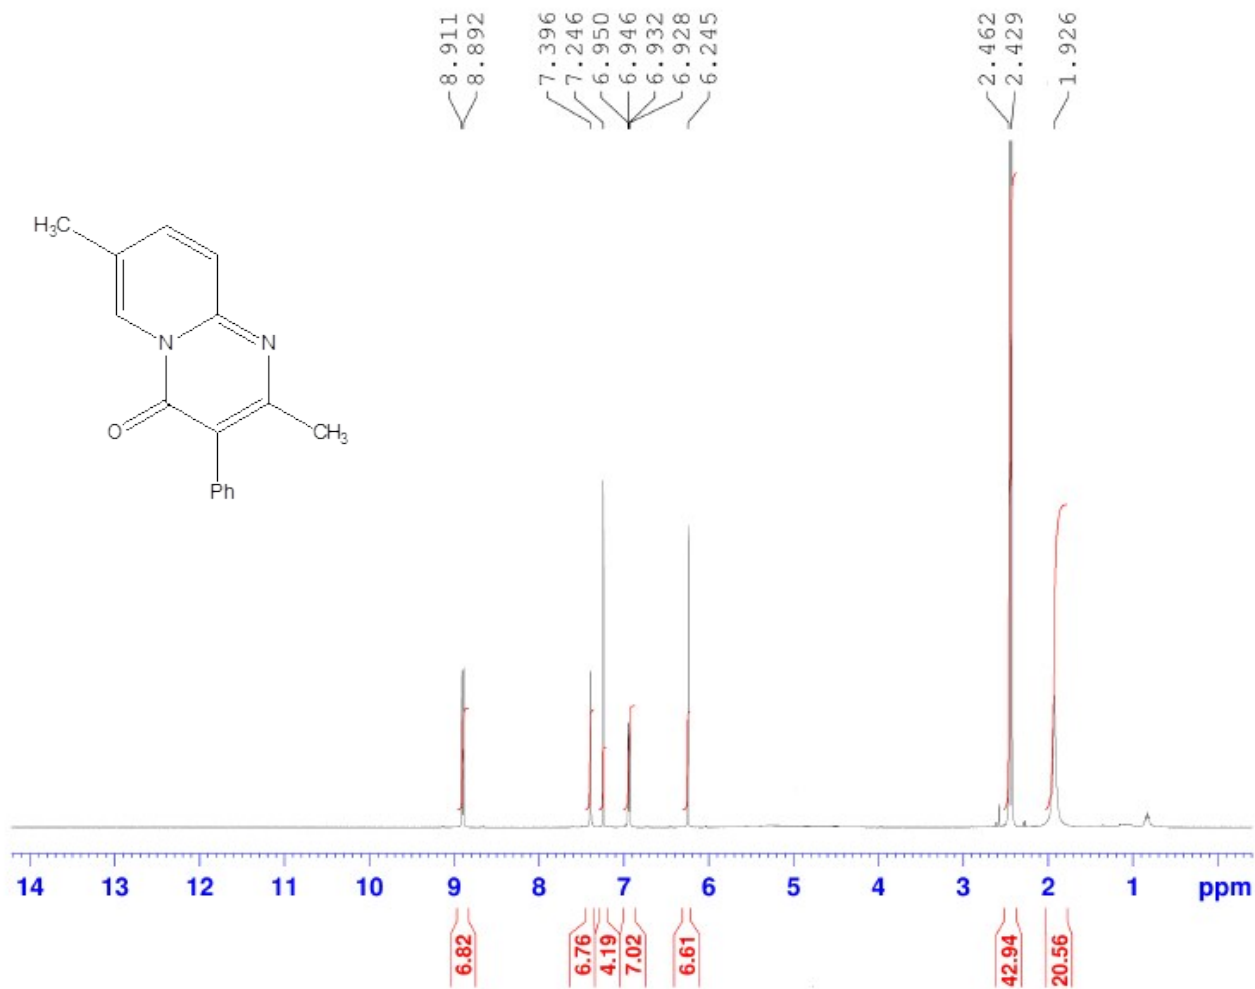

Current Data Parameters  
 NAME RAOO N-21 06-01-2016  
 EXPNO 10  
 PROCNO 1

F2 - Acquisition Parameters  
 Date\_ 20160106  
 Time 14.56  
 INSTRUM spect  
 PROBHD 5 mm PABBO BB-  
 PULPROG zg30  
 TD 65536  
 SOLVENT CDCL3  
 NS 64  
 DS 2  
 SWH 8223.685 Hz  
 FIDRES 0.125483 Hz  
 AQ 3.9846387 sec  
 RG 141.04  
 DW 60.800 usec  
 DE 6.50 usec  
 TE 298.0 K  
 D1 1.00000000 sec

----- CHANNEL f1 -----  
 NUC1 1H  
 P1 13.84 usec  
 PLW1 12.39000034 W  
 SF01 400.1824713 MHz

F2 - Processing parameters  
 SI 65536  
 SF 400.1800200 MHz  
 WDW EM  
 SSB 0  
 LB 0.30 Hz  
 GB 0  
 PC 2.00

Dr.Raoo  
 Sample : N-11 CDCL3  
 PROTON CDCl3 D:\ nmr

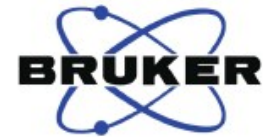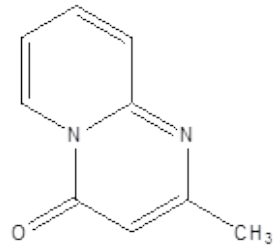

9.001  
 8.983  
 7.711  
 7.707  
 7.694  
 7.689  
 7.684  
 7.672  
 7.668  
 7.566  
 7.544  
 7.246  
 7.095  
 7.091  
 7.077  
 7.075  
 7.060  
 7.057  
 6.306

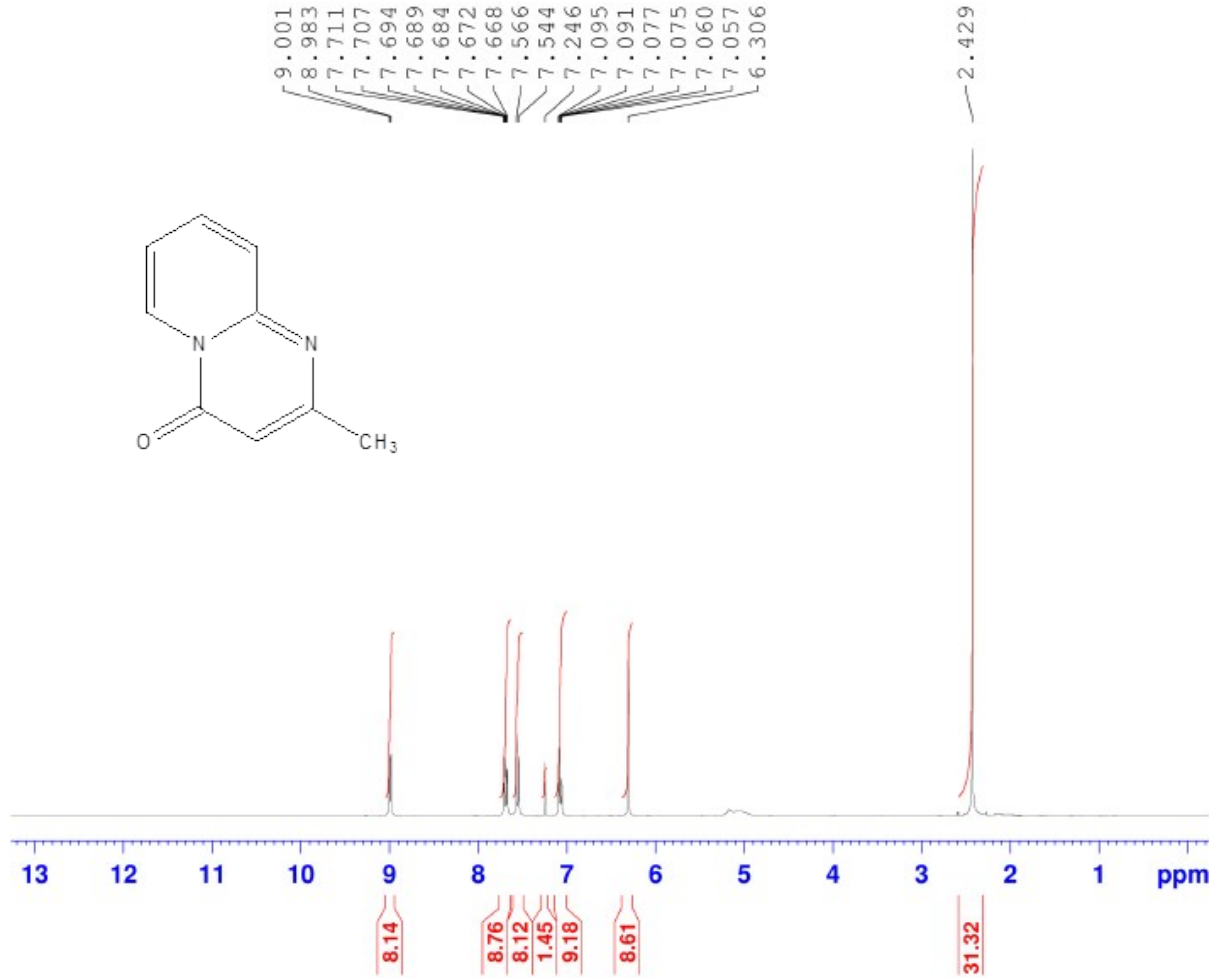

Current Data Parameters  
 NAME RAOO N-11 06-01-2016  
 EXPNO 10  
 PROCNO 1

F2 - Acquisition Parameters  
 Date\_ 20160106  
 Time 13.23  
 INSTRUM spect  
 PROBHD 5 mm PABBO BB-  
 PULPROG zg30  
 ID 65536  
 SOLVENT CDCl3  
 NS 64  
 DS 2  
 SWH 8223.685 Hz  
 FIDRES 0.125483 Hz  
 AQ 3.9846387 sec  
 RG 102.07  
 DW 60.800 usec  
 DE 6.50 usec  
 TE 298.1 K  
 D1 1.0000000 sec

----- CHANNEL f1 -----  
 NUC1 1H  
 P1 13.84 usec  
 PLW1 12.39000034 W  
 SFO1 400.1824713 MHz

F2 - Processing parameters  
 SI 65536  
 SF 400.1800200 MHz  
 WDW EM  
 SSB 0  
 LB 0.30 Hz  
 GB 0  
 PC 2.00

Dr.Rao  
 Sample : N-13 CDCL3  
 PROTON CDC13 D:\ nmr

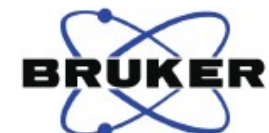

9.064  
 9.062  
 9.059  
 9.044  
 8.099  
 8.087  
 8.081  
 8.078  
 8.076  
 8.072  
 8.068  
 8.062  
 8.053  
 7.764  
 7.746  
 7.743  
 7.732  
 7.729  
 7.721  
 7.710  
 7.706  
 7.515  
 7.512  
 7.510  
 7.500  
 7.496  
 7.491  
 7.487  
 7.479  
 7.474  
 7.469  
 7.464  
 7.455  
 7.246  
 7.136  
 7.130  
 7.122  
 7.118  
 7.116  
 7.112  
 7.104  
 7.098  
 6.896

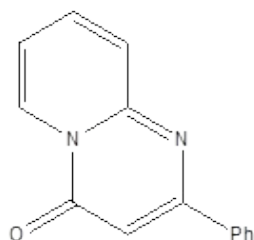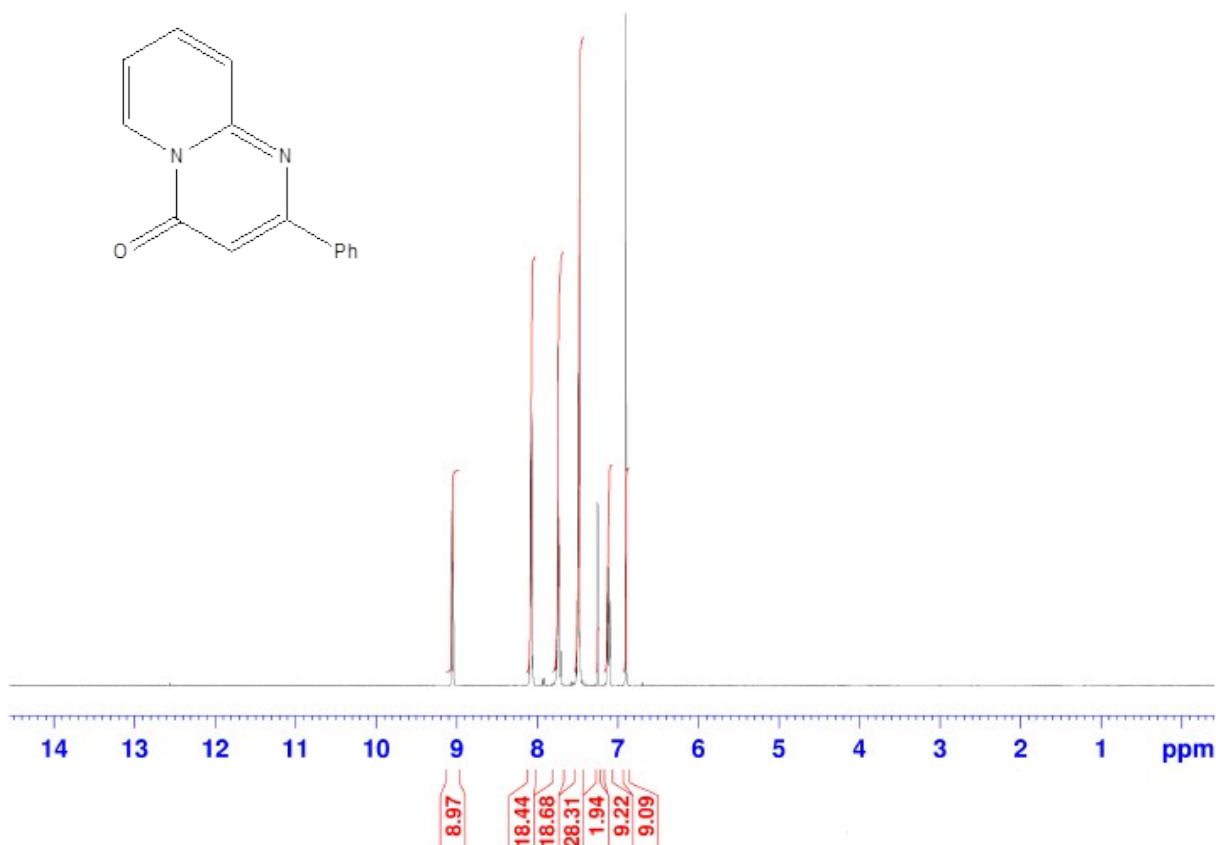

Current Data Parameters  
 NAME RAO N-13 06-01-2016  
 EXPNO 10  
 PROCNO 1

F2 - Acquisition Parameters  
 Date\_ 20160106  
 Time 14.30  
 INSTRUM spect  
 PROBHD 5 mm PABBO BB-  
 PULPROG zg30  
 TD 65536  
 SOLVENT CDCL3  
 NS 64  
 DS 2  
 SWH 8224.885 Hz  
 FIDRES 0.125483 Hz  
 AQ 3.9846387 sec  
 RG 115.23  
 DW 60.800 usec  
 DE 6.50 usec  
 TE 298.1 K  
 D1 1.00000000 sec

----- CHANNEL f1 -----  
 NUC1 1H  
 P1 13.84 usec  
 PLW1 12.39000034 W  
 SFO1 400.1824713 MHz

F2 - Processing parameters  
 SI 65536  
 SF 400.1800200 MHz  
 WDW EM  
 SSB 0  
 LB 0.30 Hz  
 GB 0  
 PC 2.00

Dr. Raoo  
 Sample : N-23 CDCL3  
 PROTON CDC13 D:\ nmr

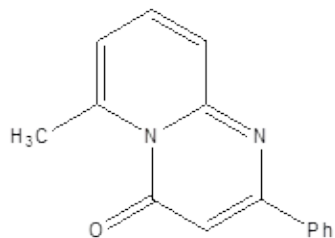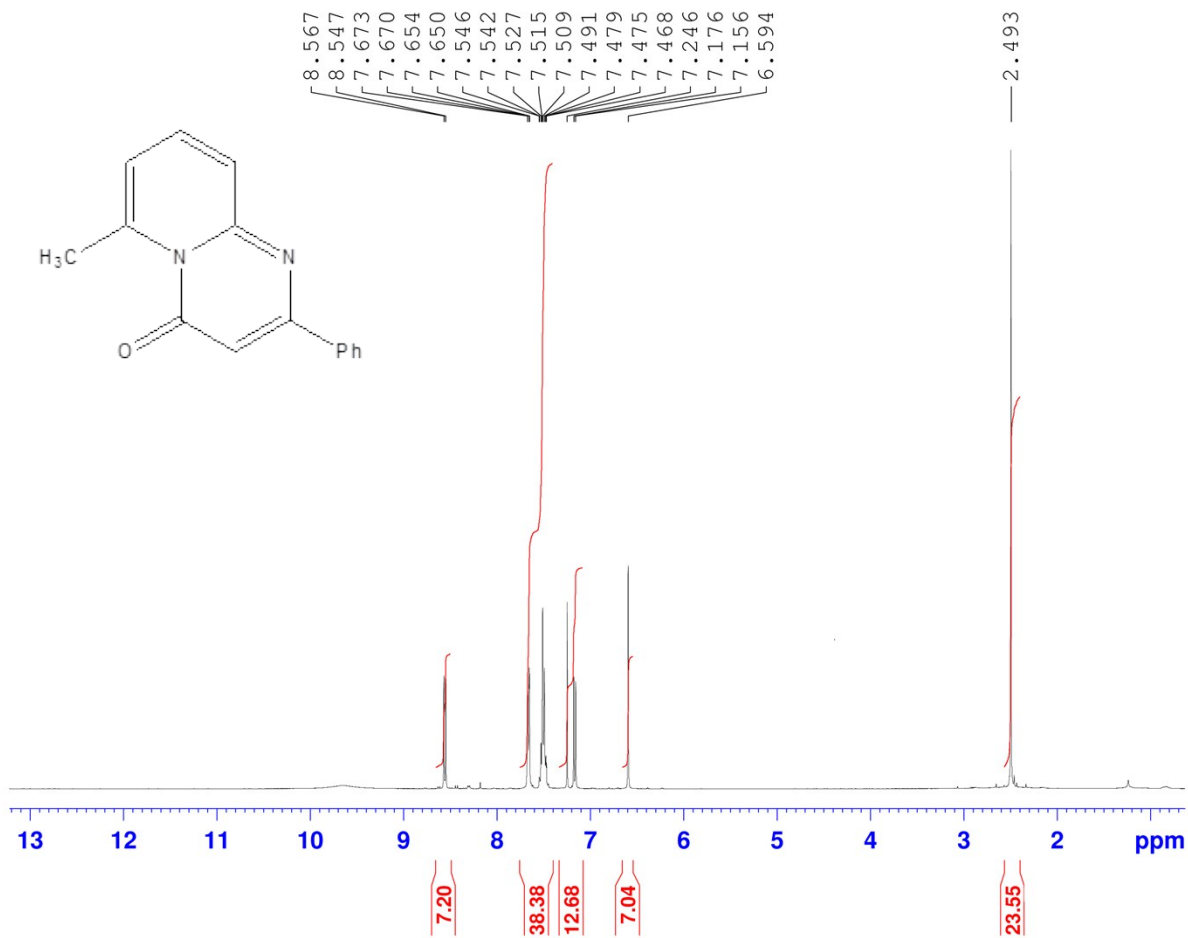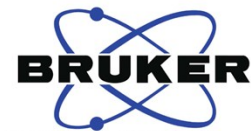

Current Data Parameters  
 NAME RAOO N-23 06-01-20  
 EXPNO 10  
 PROCNO 1

F2 - Acquisition Parameters  
 Date\_ 20160106  
 Time 19.59  
 INSTRUM spect  
 PROBHD 5 mm PABBO BB-  
 PULPROG zg30  
 TD 65536  
 SOLVENT CDC13  
 NS 64  
 DS 2  
 SWH 8223.685 Hz  
 FIDRES 0.125483 Hz  
 AQ 3.9846387 sec  
 RG 185.19  
 DW 60.800 usec  
 DE 6.50 usec  
 TE 298.0 K  
 D1 1.00000000 sec

===== CHANNEL f1 =====  
 NUC1 1H  
 P1 13.84 usec  
 PLW1 12.39000034 W  
 SFO1 400.1824713 MHz

F2 - Processing parameters  
 SI 65536  
 SF 400.1800200 MHz  
 WDW EM  
 SSB 0  
 LB 0.30 Hz  
 GB 0  
 PC 2.00



Dr. Rao  
 Sample : N-12 CDCL3  
 PROTON CDC13 D:\ nmr

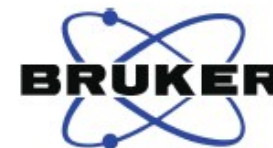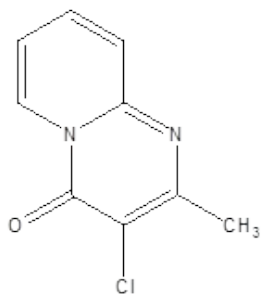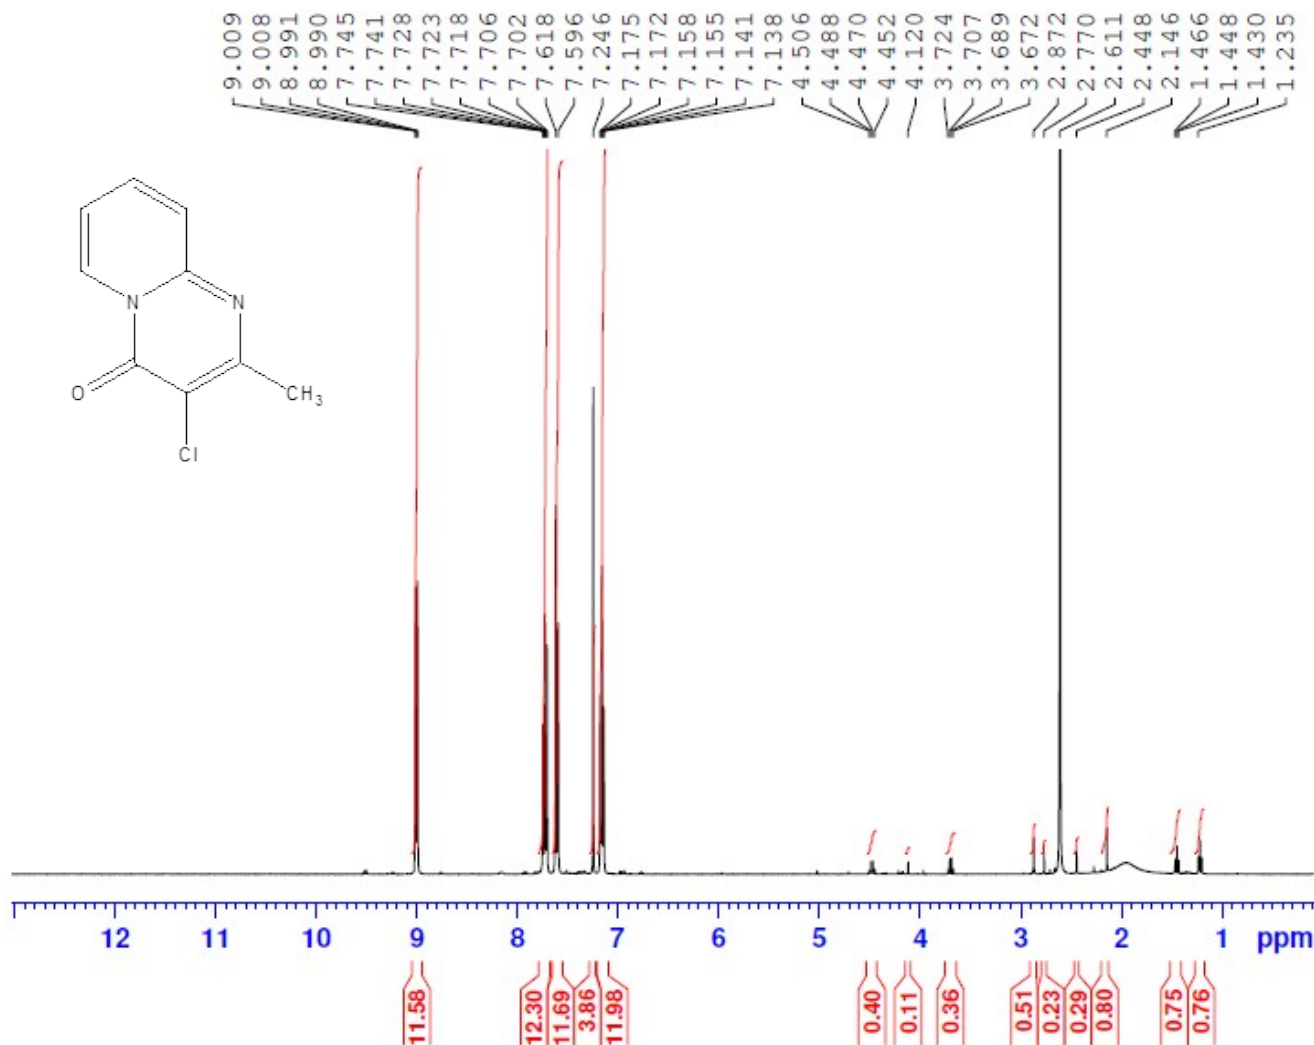

Current Data Parameters  
 NAME RAOO N-12 06-01-2016  
 EXPNO 10  
 PROCNO 1

F2 - Acquisition Parameters  
 Date\_ 20160106  
 Time 13.48  
 INSTRUM spect  
 PROBHD 5 mm PABBO BB-  
 PULPROG zg30  
 TD 65536  
 SOLVENT CDC13  
 NS 64  
 DS 2  
 SWH 8223.685 Hz  
 FIDRES 0.125483 Hz  
 AQ 3.9846387 sec  
 RG 141.04  
 DW 60.800 usec  
 DE 6.50 usec  
 TE 298.0 K  
 D1 1.00000000 sec

==== CHANNEL f1 =====  
 NUC1 1H  
 P1 13.84 usec  
 PLW1 12.39000034 W  
 SFO1 400.1824713 MHz

F2 - Processing parameters  
 SI 65536  
 SF 400.1800200 MHz  
 WDW EM  
 SSB 0  
 LB 0.30 Hz  
 GB 0  
 PC 2.00

# 13C NMR spectra

Dr. Raoo  
 Sample : N-12 CDCL3  
 C13CPD CDC13 D:\ nmr

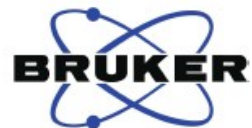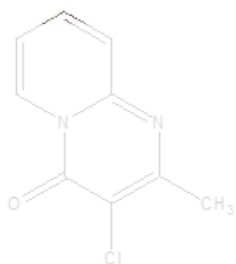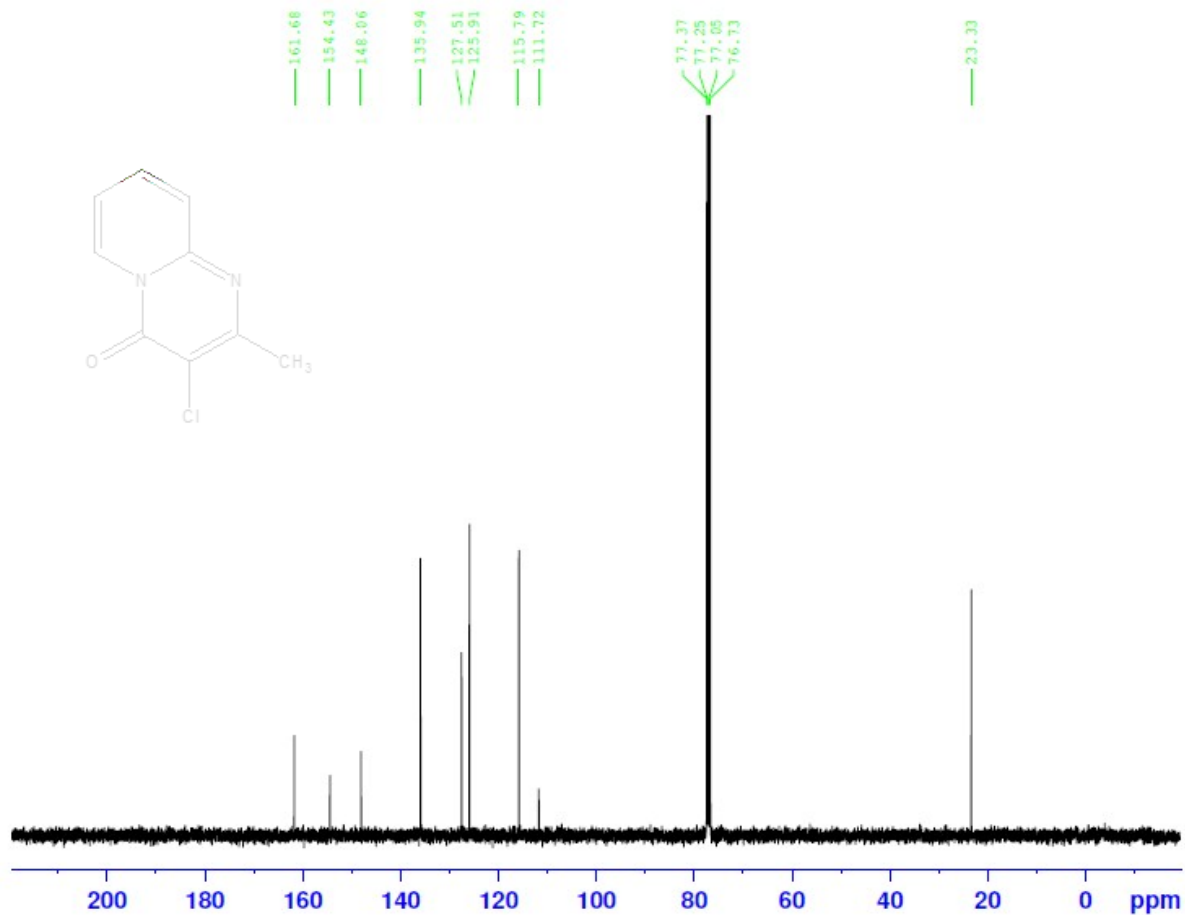

Current Data Parameters  
 NAME RAOO N-12 06-01-2016  
 EXPNO 11  
 PROCNO 1

F2 - Acquisition Parameters  
 Date\_ 20160106  
 Time 13.55  
 INSTRUM spect  
 PROBHD 5 mm PABBO BB-  
 PULPROG zgpg30  
 TD 65536  
 SOLVENT CDCL3  
 NS 510  
 DS 4  
 SWH 24038.461 Hz  
 FIDRES 0.366798 Hz  
 AQ 1.3631988 sec  
 RG 185.19  
 LW 20.800 usec  
 DE 6.50 usec  
 TE 298.0 K  
 D1 2.0000000 sec  
 D11 0.0300000 sec

==== CHANNEL f1 ====  
 NUC1 13C  
 P1 8.87 usec  
 PLW1 61.0000000 W  
 SFO1 100.6354031 MHz

==== CHANNEL f2 ====  
 CPDPRG2 waltz16  
 NUC2 1H  
 PCPD2 90.00 usec  
 PLW2 12.39000034 W  
 PLW12 0.29299000 W  
 PLW13 0.14654000 W  
 SFO2 400.1816007 MHz

F2 - Processing parameters  
 SI 32768  
 SF 100.6253410 MHz  
 WDW EM  
 SSB 0  
 LB 1.00 Hz  
 GB 0  
 PC 1.40

Dr. Rao  
Sample : N-21 CDCL3  
C13CPD CDC13 D:\ nmr

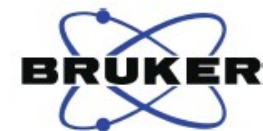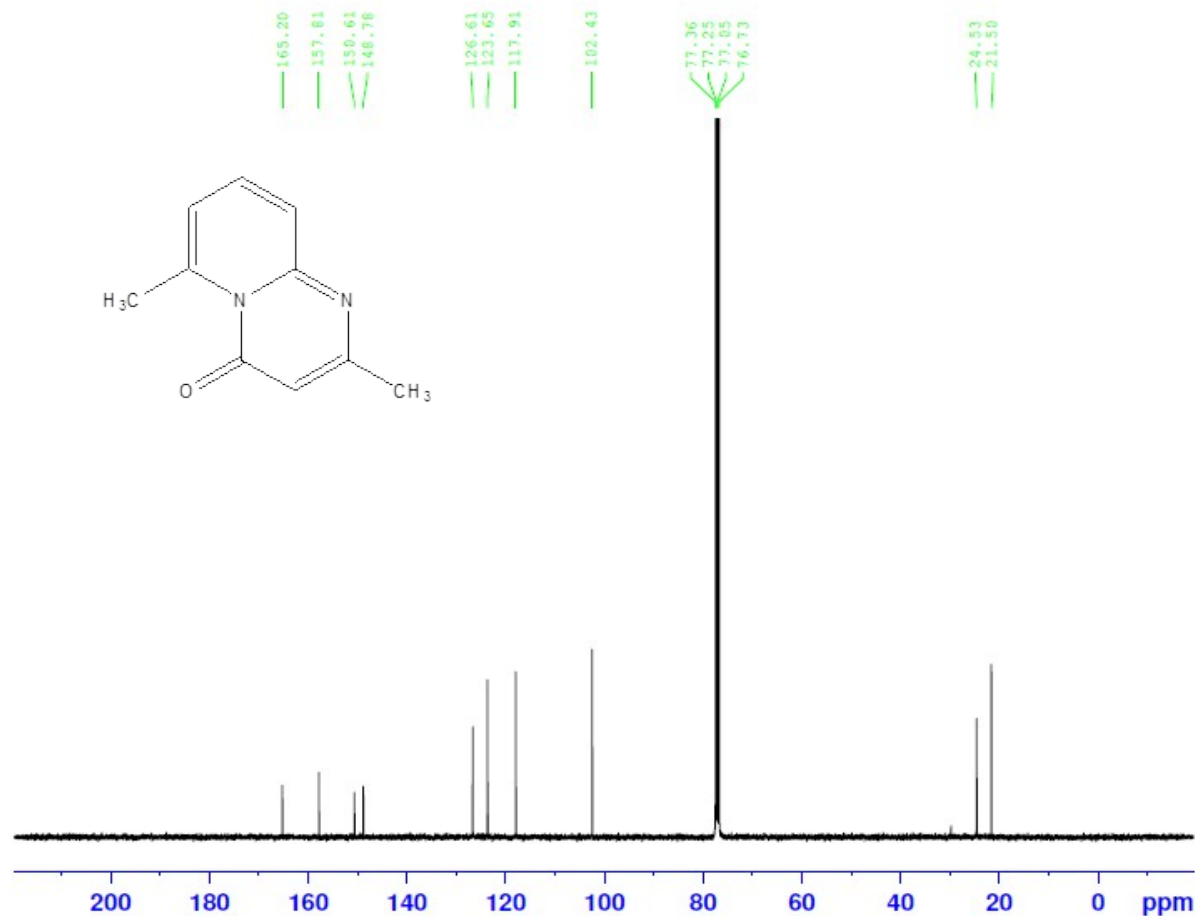

Current Data Parameters  
NAME RAOO N-21 06-01-2016  
EXPNO 11  
PROCNO 1

F2 - Acquisition Parameters  
Date\_ 20160106  
Time 15.08  
INSTRUM spect  
PROBHD 5 mm PABBO BB-  
PULPROG zgpg30  
TD 65536  
SOLVENT CDCL3  
NS 5120  
DS 4  
SWH 24038.461 Hz  
FIDRES 0.366798 Hz  
AQ 1.3631988 sec  
RG 198.36  
DW 20.800 usec  
DE 6.50 usec  
TE 298.0 K  
D1 2.0000000 sec  
D11 0.0300000 sec

==== CHANNEL f1 =====  
NUC1 13C  
P1 8.87 usec  
PLW1 61.0000000 W  
SFO1 100.6354031 MHz

==== CHANNEL f2 =====  
CPDPRG2 waltz16  
NUC2 1H  
PCPD2 90.00 usec  
PLW2 12.39000034 W  
PLW12 0.29299000 W  
PLW13 0.14654000 W  
SFO2 400.1816007 MHz

F2 - Processing parameters  
SI 32768  
SF 100.6253410 MHz  
WDW EM  
SSB 0  
LB 1.00 Hz  
GB 0  
PC 2.00

Dr. Raoo  
 Sample : N-23 CDCL3  
 C13CPD CDC13 D:\ nmr

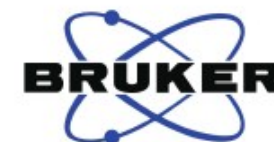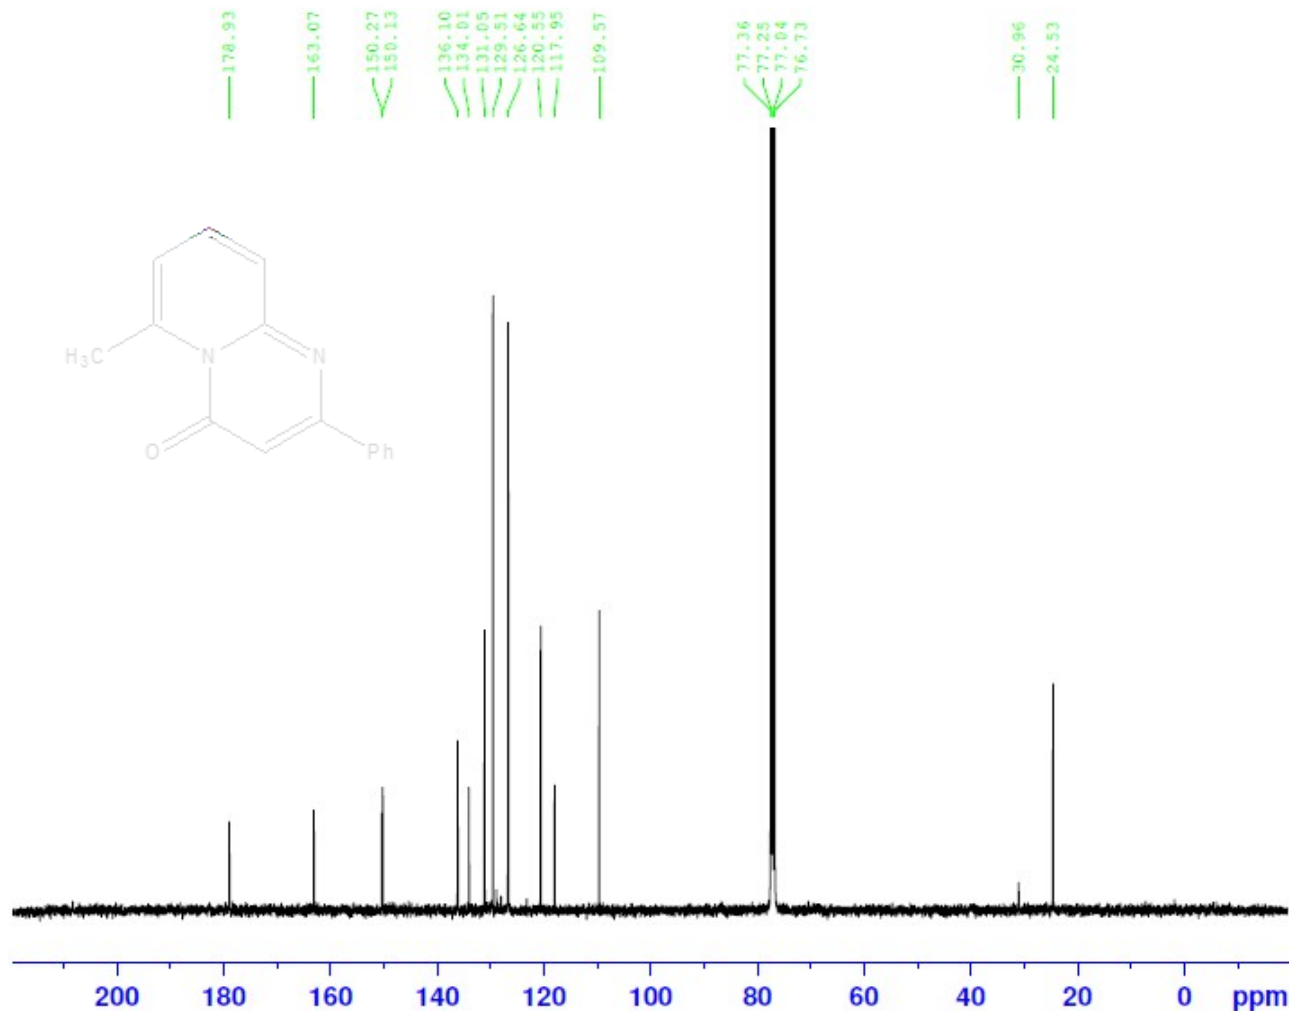

Current Data Parameters  
 NAME RA00 N-23 06-01-2016  
 EXPNO 11  
 PROCNO 1

F2 - Acquisition Parameters  
 Date\_ 20160107  
 Time 0.53  
 INSTRUM spect  
 PROBHD 5 mm PABBO BB-  
 PULPROG zgpg30  
 TD 65536  
 SOLVENT CDC13  
 NS 5120  
 DS 4  
 SWH 24038.461 Hz  
 FIDRES 0.366798 Hz  
 AQ 1.3631988 sec  
 RG 115.23  
 DW 20.800 usec  
 DE 6.50 usec  
 TE 298.0 K  
 D1 2.0000000 sec  
 D11 0.0300000 sec

==== CHANNEL f1 =====  
 NUC1 13C  
 P1 8.87 usec  
 PLW1 61.0000000 W  
 SFO1 100.6354031 MHz

==== CHANNEL f2 =====  
 CPDPRG2 waltz16  
 NUC2 1H  
 PCPD2 90.00 usec  
 PLW2 12.39000034 W  
 PLW12 0.29299000 W  
 PLW13 0.14654000 W  
 SFO2 400.1816007 MHz

F2 - Processing parameters  
 SI 32768  
 SF 100.6253410 MHz  
 WDW EM  
 SSB 0  
 LB 1.50 Hz  
 GB 0  
 PC 2.00

Dr. Raoo  
Sample : N-13 CDCL3  
C13CPD CDC13 D:\ nmr

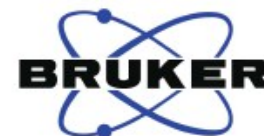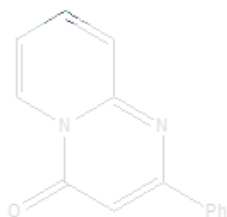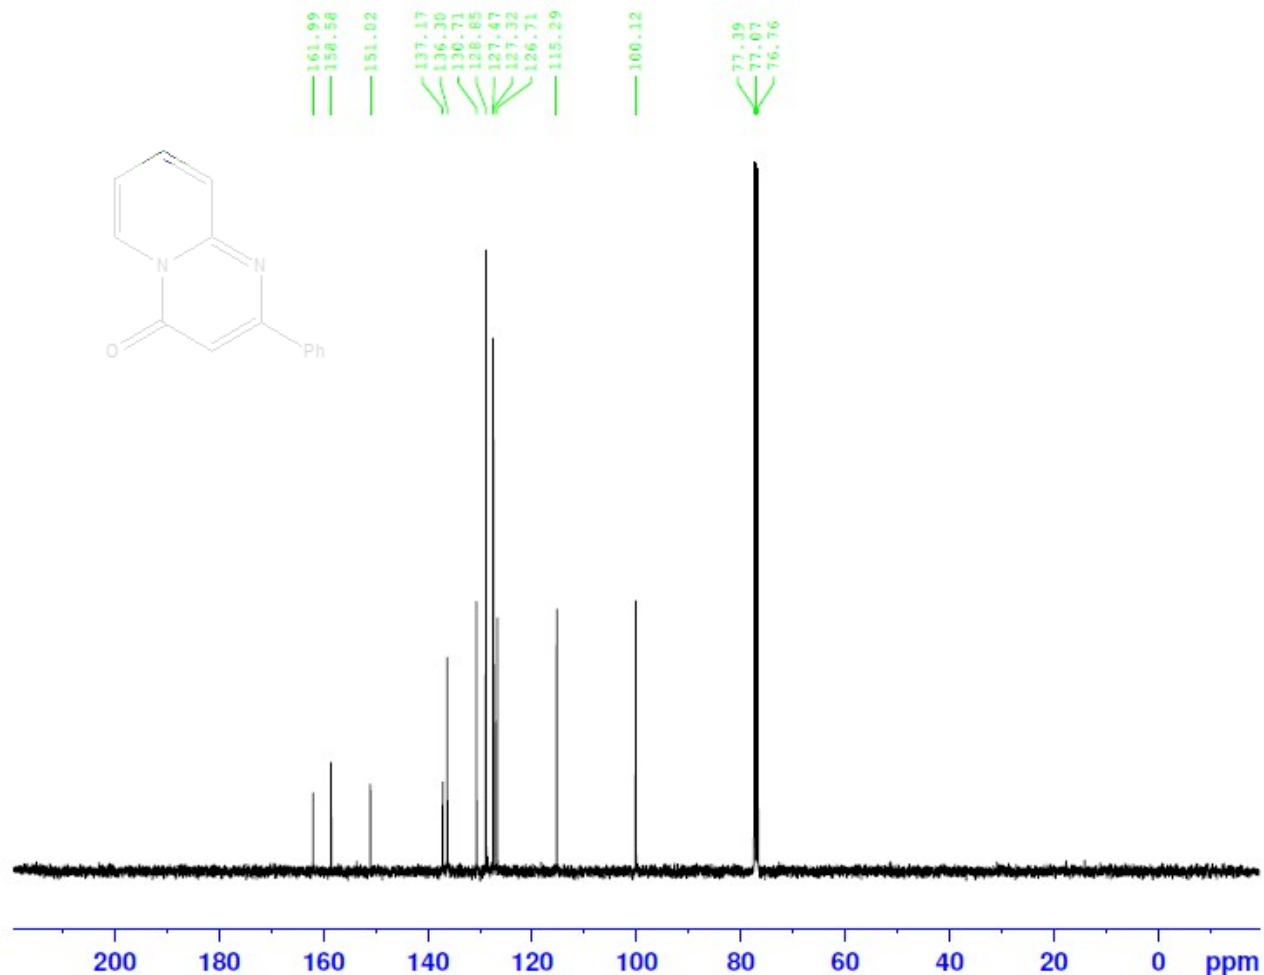

Current Data Parameters  
NAME RA00 N-13 06-01-2016  
EXPNO 11  
PROCNO 1

F2 - Acquisition Parameters  
Date\_ 20160106  
Time 14.47  
INSTRUM spect  
PROBHD 5 mm PABBO BB-  
PULPROG zgpg30  
TD 65536  
SOLVENT CDC13  
NS 270  
DS 4  
SWH 24038.461 Hz  
FIDRES 0.366798 Hz  
AQ 1.3631988 sec  
RG 185.19  
DW 20.800 usec  
DE 6.50 usec  
TE 298.0 K  
D1 2.00000000 sec  
D11 0.03000000 sec

==== CHANNEL f1 =====  
NUC1 13C  
P1 8.87 usec  
PLW1 61.00000000 W  
SFO1 100.6354031 MHz

==== CHANNEL F2 =====  
CPDPRG2 waltz16  
NUC2 1H  
PCPD2 90.00 usec  
PLW2 12.39000034 W  
PLW12 0.29299000 W  
PLW13 0.14654000 W  
SFO2 400.1816007 MHz

F2 - Processing parameters  
SI 32768  
SF 100.6253410 MHz  
WDW EM  
SSB 0  
LB 1.50 Hz  
GB 0  
PC 2.00

Dr. Raoo  
 Sample : N-11 CDCL3  
 C13CPD CDC13 D:\ nmr

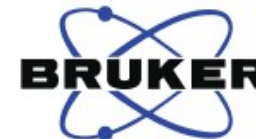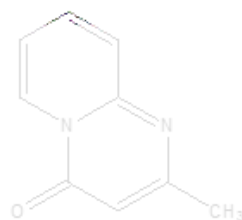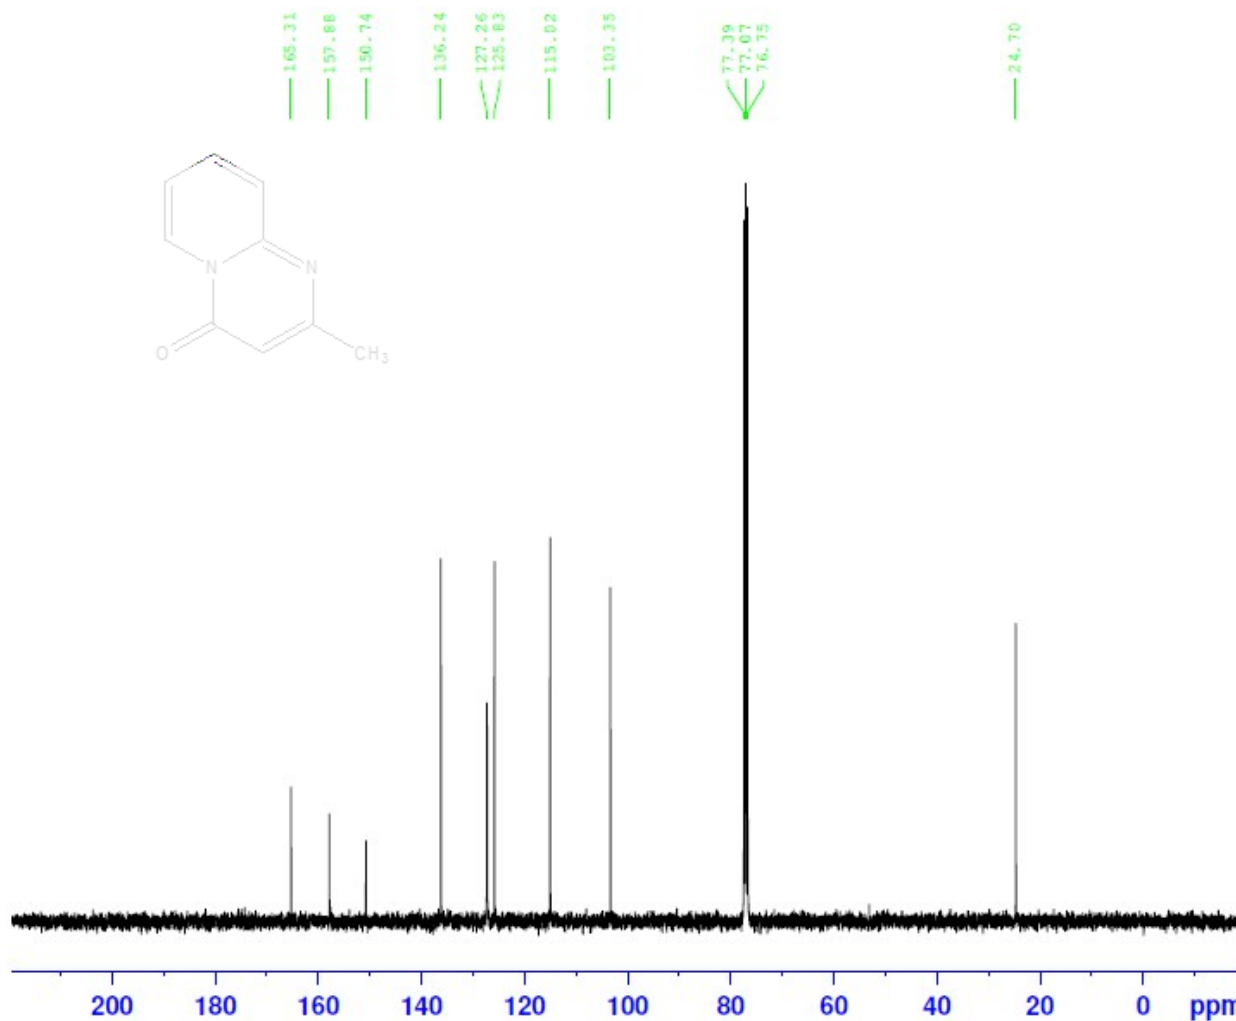

Current Data Parameters  
 NAME RAOO N-11 06-01-2016  
 EXPNO 11  
 PROCNO 1

F2 - Acquisition Parameters  
 Date\_ 20160106  
 Time 13.26  
 INSTRUM spect  
 PROBHD 5 mm PABBO BB-  
 PULPROG zgpg30  
 TD 65536  
 SOLVENT CDC13  
 NS 240  
 DS 4  
 SWH 24038.461 Hz  
 FIDRES 0.366798 Hz  
 AQ 1.3631988 sec  
 RG 198.36  
 DW 20.800 usec  
 DE 6.50 usec  
 TE 297.9 K  
 D1 2.00000000 sec  
 D11 0.03000000 sec

==== CHANNEL f1 =====  
 NUC1 13C  
 P1 8.87 usec  
 PLW1 61.00000000 W  
 SFO1 100.6354031 MHz

==== CHANNEL f2 =====  
 CPDPRG2 waltz16  
 NUC2 1H  
 PCPD2 90.00 usec  
 PLW2 12.39000034 W  
 PLW12 0.29299000 W  
 PLW13 0.14654000 W  
 SFO2 400.1816007 MHz

F2 - Processing parameters  
 SI 32768  
 SF 100.6253410 MHz  
 WDW EM  
 SSB 0  
 LB 1.50 Hz  
 GB 0  
 PC 2.00

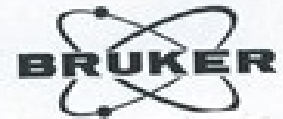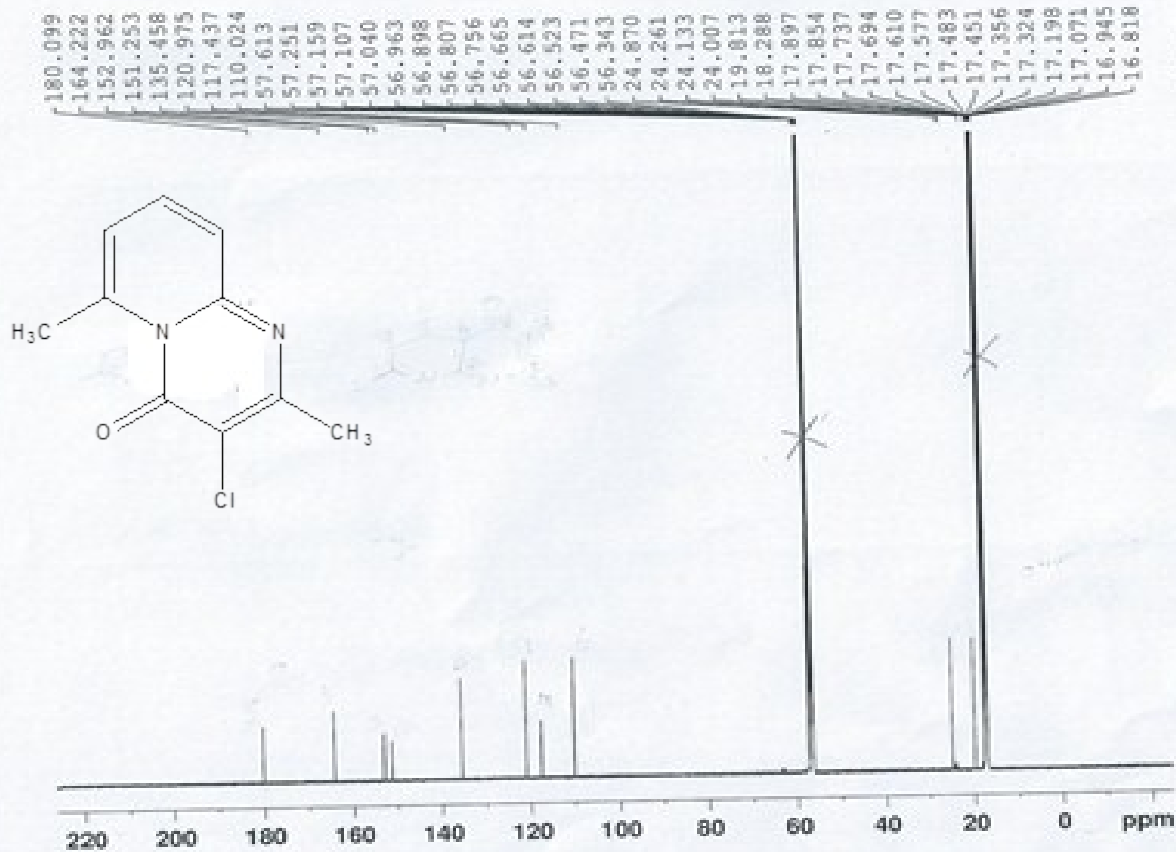

```

EXPNO          11
PROCNO         4
Date_          1
Time
INSTRUM        spect
PROBHD         5 mm CPDOR 13C
PULPROG        zgpg30
TD             131072
SF            125.761 MHz
SOLVENT        CDCl3
NS             4096
DS             4
SWH            31678.789 Hz
FIDRES        0.288992 Hz
AQ            1.7362004 sec
RG            203
DM            13.200 usec
DE            71.32 usec
TE            299.0 K
D1            2.0000000 sec
D11           0.0300000 sec
TD0           1

===== CHANNEL f1 =====
NUC1           13C
P1             9.90 usec
PL1            2.80 dB
PL12W         37.96579361 W
SFO1          125.7610000 MHz

===== CHANNEL f2 =====
CPDPRG2       waltz16
NUC2           1H
PCPD2         70.00 usec
PS2           -0.70 dB
PL12         16.20 dB
PL13         19.20 dB
PL2W         19.62554169 W
PL12W        0.39248162 W
PL13W        0.19670779 W
SFO2         400.6824000 MHz
SI            131072
SF           150.8900967 MHz
WDW           EM
SSB           0
LB            1.00 Hz
GB            0
PC            1.40
  
```

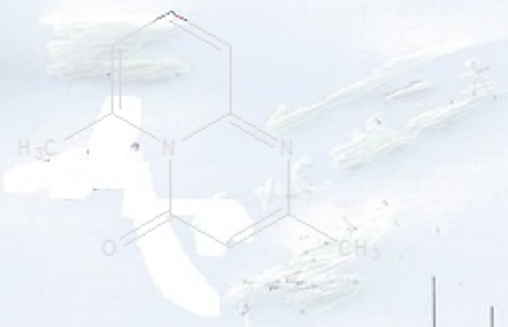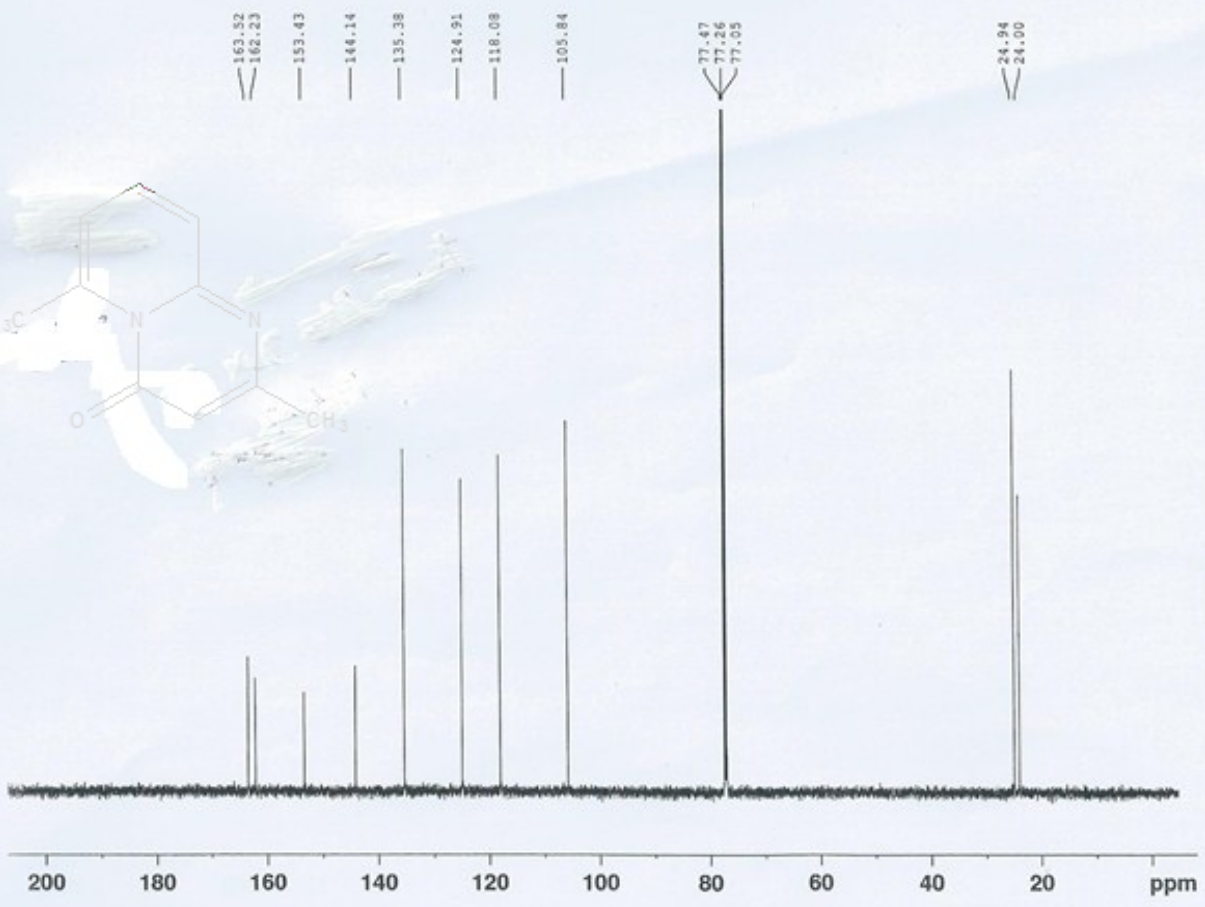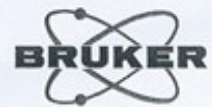

Current Data Parameters  
NAME Ectans6  
EXPNO 12  
PROCNO 1

F2 - Acquisition Parameters  
NAME spect  
INSTRUM spect  
PROBHD 5 mm PABBI 1H/  
PULPROG zgpg30  
TD 32768  
SOLVENT CDCl3  
NS 512  
DS 4  
SWH 34722.223 Hz  
FIDRES 1.059638 Hz  
AQ 0.4719002 sec  
RG 173.48  
DW 14.400 usec  
DE 6.50 usec  
TE 298.0 K  
D1 2.0000000 sec  
D11 0.0300000 sec  
TD0 1

----- CHANNEL f1 -----  
NUC1 13C  
P1 14.90 usec  
PLW1 101.0000000 W  
SFO1 150.9194083 MHz

----- CHANNEL f2 -----  
CPDPRG2 waltz16  
NUC2 1H  
PCPD2 70.00 usec  
PLW2 15.5000000 W  
PLW12 0.19742000 W  
PLW13 0.03673600 W  
SFO2 400.1319193 MHz

F2 - Processing parameters  
SI 32768  
SF 150.9027168 MHz  
WDW EM  
SSB 0  
LB 1.00 Hz  
GB 0  
PC 1.40



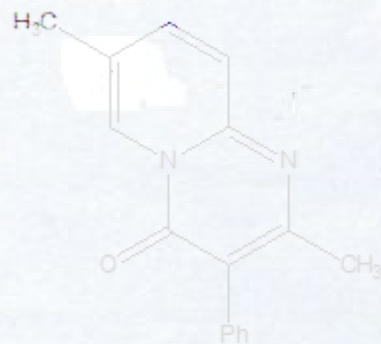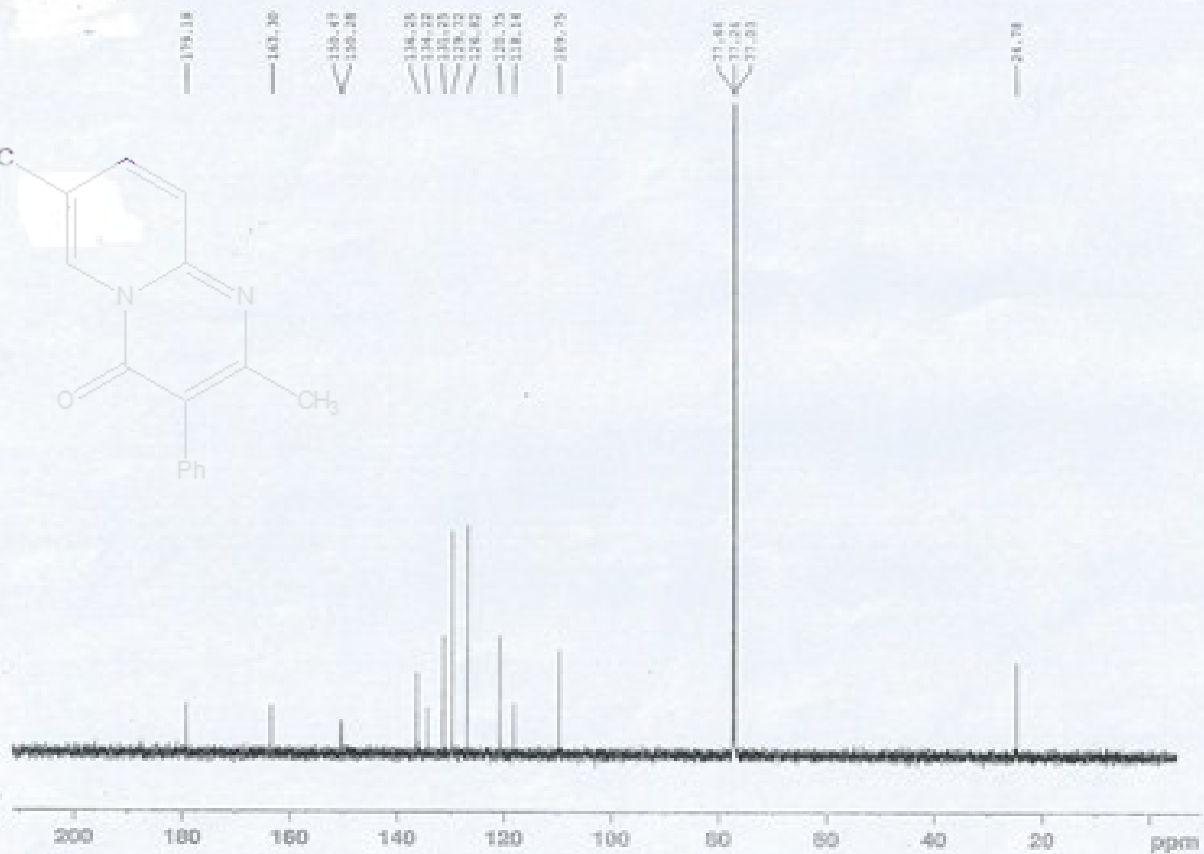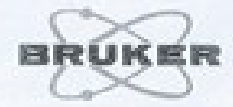

Current Data Parameters  
 NAME: T00000\_2  
 EXPR: 12  
 PROCNO: 1

F2 - Acquisition Parameters  
 F2: 127.75 MHz  
 DATE\_1: 20000101  
 TIME: 10.00  
 PULPROG: zgpg30  
 FULPROG: zgpg30  
 PSYPRG: zgpg30  
 PC: 32768  
 SOLVENT: CDCl3  
 NS: 612  
 DS: 4  
 SWH: 34702.251 Hz  
 FIDRES: 1.258800 Hz  
 AQ: 0.4710000 sec  
 RG: 313.88  
 SF: 14.4600 MHz  
 CF: 4.50 MHz  
 CB: 299.0 Hz  
 CD: 0.0000000 sec  
 C1: 0.0000000 sec  
 C2: 0.0000000 sec  
 C3: 0.0000000 sec  
 C4: 0.0000000 sec

===== CHANNEL F1 =====  
 NUCL1: 13C  
 P1: 14.00 usec  
 PL1: 100.0000000 W  
 PR1: 100.0000000 Hz

===== CHANNEL F2 =====  
 CPDPRG2: waltz16  
 NUCL2: 1H  
 P2P2P2: 79.00 usec  
 PL2: 10.00000000 W  
 PL3: 0.19742000 W  
 PR3: 0.00000000 Hz  
 PR4: 0.00000000 Hz  
 PR5: 400.0000000 MHz

F2 - Processing parameters  
 SI: 32768  
 SF: 127.7500000 MHz  
 WHW: 4  
 DS: 4  
 LA: 1.00 Hz  
 GB: 0  
 PC: 1.40
